# Supplementary material
Source: publisher figshare collection journal article supplement (https://sage.figshare.com/ndownloader/files/17059421)
Supplement: Supplementary file 1 [file 17059421]

Table 3  
*Factor loading for network uncertainty items*

| Scale | Network-self<br>acceptance | Judging    | Third party<br>threat | Network-<br>partner<br>acceptance | Jealousy/time<br>split |
|-------|----------------------------|------------|-----------------------|-----------------------------------|------------------------|
| 1     | <b>.80</b>                 | .02        | .13                   | .07                               | .11                    |
| 2     | <b>.82</b>                 | .05        | .08                   | .02                               | .07                    |
| 3     | <b>.91</b>                 | .01        | .03                   | .02                               | .02                    |
| 5     | <b>.63</b>                 | .04        | .00                   | .04                               | .10                    |
| 6     | <b>.78</b>                 | .11        | .03                   | .05                               | .03                    |
| 7     | <b>.78</b>                 | .17        | .03                   | .02                               | .00                    |
| 9     | <b>.59</b>                 | .30        | .09                   | .10                               | .03                    |
| 11    | .16                        | <b>.65</b> | .11                   | .07                               | .02                    |
| 12    | .33                        | <b>.54</b> | .06                   | .07                               | .02                    |
| 13    | .07                        | <b>.77</b> | .04                   | .02                               | .08                    |
| 14    | .09                        | <b>.71</b> | .00                   | .03                               | .12                    |
| 16    | .01                        | .08        | <b>.89</b>            | .04                               | .01                    |
| 17    | .03                        | .01        | <b>.81</b>            | .02                               | .07                    |
| 21    | .11                        | .15        | .06                   | <b>.77</b>                        | .02                    |
| 22    | .18                        | .15        | .01                   | <b>.75</b>                        | .09                    |
| 23    | .22                        | .17        | .08                   | <b>.67</b>                        | .07                    |
| 25    | .02                        | .08        | .03                   | <b>.65</b>                        | .07                    |
| 26    | .03                        | .02        | .03                   | <b>.87</b>                        | .02                    |

|    |     |     |     |            |            |
|----|-----|-----|-----|------------|------------|
| 27 | .00 | .09 | .04 | <b>.89</b> | .03        |
| 28 | .02 | .11 | .03 | <b>.89</b> | .06        |
| 29 | .06 | .10 | .09 | <b>.90</b> | .00        |
| 31 | .04 | .12 | .09 | .04        | <b>.57</b> |
| 32 | .20 | .12 | .09 | .01        | <b>.68</b> |
| 33 | .04 | .02 | .02 | .02        | <b>.76</b> |
| 34 | .07 | .04 | .01 | .09        | <b>.79</b> |
| 35 | .03 | .00 | .07 | .05        | <b>.88</b> |
| 37 | .03 | .15 | .15 | <b>.55</b> | .06        |
| 38 | .09 | .08 | .07 | <b>.68</b> | .12        |
| 39 | .10 | .07 | .10 | <b>.61</b> | .15        |
| 40 | .07 | .09 | .13 | <b>.58</b> | .12        |

---

*Note.* Factor loadings > .50 are bolded. Kaiser-Meyer-Olkin measure of sampling adequacy = .95  
Bartlett's test of sphericity (528),  $\chi^2 = 8181.68$ ,  $p < .001$ .

## HOW CERTAIN ARE YOU THAT...

1. Your partner's social network accepts you as their friend/family member's significant other
2. Your partner's social network approves of the fact that you and your partner are together
3. Your partner's social network acts in a way that displays acceptance of you being in your partner's life
- 4. Your partner's social network purposefully interferes with your relationship**
- 5. Your partner's social network thinks that you are "good enough" for your partner**
6. Your partner's social network likes you
- 7. Your partner's social network enjoys spending time with you**
- 8. Your partner's social network has invited you into their social circle**
- 9. Your partner's social network wants to be friends with you**
- 10. Your partner's social network would spend time with you even if your partner was not around**
11. Your partner's social network does not make negative judgments about you you are as a person
- 12. Your partner's social network does not hold any of your insecurities against you**
13. Your partner's social network does not talk about you behind your back
14. Your partner's social network does not constantly evaluate you
- 15. Your partner's social network treats you the way that you want to be treated**
16. Your partner does not have a romantic connection with any of their social network members
17. Your partner does not have a physical relationship with any of their social network members
18. Your partner's social network members do not encourage them to cheat on you
- 19. Your partner prioritizes you over their social network**
- 20. Your partner's social network does not threaten your relationship in any way**
- 21. Your social network accepts your partner as your significant other**
- 22. Your social network approves of the fact that you are with your current partner**
- 23. Your social network acts in a way that displays acceptance of your partner being in your life**
24. Your social network might purposefully interfere with your relationship
25. Your social network thinks that your partner is "good enough" for you
- 26. Your social network likes your partner**
- 27. Your social network enjoys spending time with your partner**
28. Your social network has welcomed your partner into your social circle
29. Your social network wants to be friends with your partner
- 30. Your social network would spend time with your partner even if you were not around**
- 31. Your partner is not jealous of the relationship that you have with any of your social network members**

**32. Your partner trusts you not to cheat on them with anyone from your social network**

**33. Your partner has no problem with you hanging around any of your social network members when you are not around**

34. Your partner does not feel threatened by any of your network members

35. Your partner does not get angry when you spend time with your social network members

**36. You can balance spending time with your partner vs. spending time with your social network**

**37. You can pay attention to the needs of your partner as well as the members of your social network**

38. You never have to "choose" between your partner or your network members

**39. The amount of time that you spend with your partner does not influence the relationship(s) you have with your social network**

40. The amount of time that you spend with your social network member(s) does not influence the relationship that you have with your partner
